# Supplementary material for: Plasma carotenoids, tocopherols and retinol - Association with age in the Berlin Aging Study II
Source: PubMed Central journal article supplement — Redox Biol. 2020 Feb 13;32:101461. doi: 10.1016/j.redox.2020.101461 (PMC7030983; doi:10.1016/j.redox.2020.101461), 2020-02-13
Supplement: mmc1.pdf [file mmc1.pdf]

**Supplemental Table 1. Frequencies of self-reported intake of micronutrient-rich foods and supplements**

|                           | <b>young male<br/>(n = 221)</b> | <b>young female<br/>(n = 244)</b> | <b>old male<br/>(n = 761)</b> | <b>old female<br/>(n = 747)</b> | <b>P</b> |
|---------------------------|---------------------------------|-----------------------------------|-------------------------------|---------------------------------|----------|
| <b>Raw tomato</b>         |                                 |                                   |                               |                                 | < 0.001  |
| <i>Never</i>              | 4.1 (9)                         | 4.1 (10)                          | 2.8 (21)                      | 1.9 (14)                        |          |
| <i>≤ 1 per month</i>      | 8.1 (18)                        | 9.0 (22)                          | 6.8 (52)                      | 1.6 (12)                        |          |
| <i>2-3 per month</i>      | 23.1 (51)                       | 13.5 (33)                         | 13.3 (101)                    | 9.4 (70)                        |          |
| <i>1-2 per week</i>       | 35.3 (78)                       | 26.2 (64)                         | 28.5 (217)                    | 23.3 (174)                      |          |
| <i>3-4 per week</i>       | 16.7 (37)                       | 29.5 (72)                         | 24.4 (186)                    | 30.4 (227)                      |          |
| <i>5-6 per week</i>       | 8.1 (18)                        | 12.7 (31)                         | 13.4 (102)                    | 17.9 (134)                      |          |
| <i>≥ 1 per day</i>        | 4.5 (10)                        | 4.9 (12)                          | 10.8 (82)                     | 15.5 (116)                      |          |
| <b>Tomato sauce</b>       |                                 |                                   |                               |                                 | < 0.001  |
| <i>Never</i>              | 5.0 (11)                        | 1.6 (4)                           | 15.8 (129)                    | 9.3 (77)                        |          |
| <i>≤ 1 per month</i>      | 16.8 (41)                       | 18.9 (50)                         | 36.7 (283)                    | 36.0 (280)                      |          |
| <i>2-3 per month</i>      | 40.9 (92)                       | 44.0 (110)                        | 35.5 (274)                    | 39.8 (315)                      |          |
| <i>1-2 per week</i>       | 31.8 (72)                       | 28.4 (73)                         | 10.6 (81)                     | 12.8 (102)                      |          |
| <i>≥ 3 per week</i>       | 5.5 (12)                        | 7.0 (19)                          | 1.5 (11)                      | 2.0 (15)                        |          |
| <b>Ketchup</b>            |                                 |                                   |                               |                                 | < 0.001  |
| <i>Never</i>              | 14.5 (32)                       | 24.7 (60)                         | 22.1 (165)                    | 28.6 (212)                      |          |
| <i>≤ 1 per month</i>      | 29.1 (64)                       | 37.0 (90)                         | 38.4 (287)                    | 41.9 (310)                      |          |
| <i>2-3 per month</i>      | 30.9 (68)                       | 26.7 (65)                         | 27.4 (205)                    | 19.9 (147)                      |          |
| <i>1-2 per week</i>       | 19.5 (43)                       | 9.9 (24)                          | 10.7 (80)                     | 8.1 (60)                        |          |
| <i>≥ 3 per week</i>       | 5.9 (13)                        | 1.6 (4)                           | 1.5 (11)                      | 1.5 (11)                        |          |
| <b>Carrot juice</b>       |                                 |                                   |                               |                                 | 0.008    |
| <i>Never</i>              | 62.4 (138)                      | 54.9 (134)                        | 54.0 (407)                    | 48.9 (359)                      |          |
| <i>≤ 1 per month</i>      | 22.2 (49)                       | 32.4 (79)                         | 27.1 (204)                    | 29.2 (214)                      |          |
| <i>2-3 per month</i>      | 6.8 (15)                        | 8.6 (21)                          | 10.6 (80)                     | 14.7 (108)                      |          |
| <i>1-3 per week</i>       | 6.8 (15)                        | 2.5 (6)                           | 5.7 (43)                      | 5.0 (37)                        |          |
| <i>≥ 4-6 per week</i>     | 1.8 (4)                         | 1.6 (4)                           | 2.6 (20)                      | 2.2 (16)                        |          |
| <b>Multivitamin juice</b> |                                 |                                   |                               |                                 | < 0.001  |
| <i>Never</i>              | 16.3 (36)                       | 30.7 (75)                         | 51.4 (388)                    | 54.4 (400)                      |          |
| <i>≤ 1 per month</i>      | 33.0 (73)                       | 34.4 (84)                         | 26.9 (203)                    | 26.7 (196)                      |          |
| <i>2-3 per month</i>      | 24.9 (55)                       | 20.9 (51)                         | 12.8 (97)                     | 11.0 (81)                       |          |
| <i>1-3 per week</i>       | 17.6 (39)                       | 7.8 (19)                          | 6.0 (45)                      | 5.3 (39)                        |          |
| <i>≥ 4-6 per week</i>     | 8.2 (18)                        | 6.1 (15)                          | 2.9 (22)                      | 2.6 (19)                        |          |
| <b>Nuts</b>               |                                 |                                   |                               |                                 | < 0.001  |
| <i>Never</i>              | 10.9 (24)                       | 7.8 (19)                          | 8.6 (65)                      | 6.2 (46)                        |          |
| <i>≤ 1 per month</i>      | 39.5 (87)                       | 39.3 (96)                         | 32.2 (244)                    | 27.8 (207)                      |          |
| <i>2-3 per month</i>      | 29.1 (64)                       | 27.5 (67)                         | 24.6 (186)                    | 27.0 (201)                      |          |
| <i>1-2 per week</i>       | 11.4 (25)                       | 14.8 (36)                         | 18.4 (139)                    | 19.3 (144)                      |          |
| <i>≥ 3 per week</i>       | 9.2 (20)                        | 10.6 (26)                         | 16.3 (123)                    | 19.9 (147)                      |          |
| <b>Orange juice</b>       |                                 |                                   |                               |                                 | < 0.001  |
| <i>Never</i>              | 5.0 (11)                        | 6.6 (16)                          | 14.9 (111)                    | 20.5 (151)                      |          |
| <i>≤ 1 per month</i>      | 24.1 (53)                       | 23.5 (57)                         | 29.0 (216)                    | 33.0 (243)                      |          |
| <i>2-3 per month</i>      | 20.9 (46)                       | 25.9 (63)                         | 24.7 (184)                    | 20.6 (152)                      |          |
| <i>1-3 per week</i>       | 30.0 (66)                       | 25.5 (62)                         | 17.6 (131)                    | 14.9 (110)                      |          |
| <i>≥ 4-6 per week</i>     | 20.1 (44)                       | 18.5 (45)                         | 13.9 (104)                    | 10.9 (81)                       |          |

|                          | young male<br>(n = 221) | young female<br>(n = 244) | old male<br>(n = 761) | old female<br>(n = 747) | <i>P</i> |
|--------------------------|-------------------------|---------------------------|-----------------------|-------------------------|----------|
| <b>Carrots</b>           |                         |                           |                       |                         | 0.056    |
| <i>Never</i>             | 3.2 (4)                 | 0.0 (0)                   | 1.6 (8)               | 1.1 (3)                 |          |
| <i>1-2/year</i>          | 5.6 (7)                 | 1.7 (2)                   | 3.4 (17)              | 3.3 (9)                 |          |
| <i>3-5/year</i>          | 14.5 (18)               | 13.6 (16)                 | 13.9 (69)             | 7.7 (21)                |          |
| <i>6-20/year</i>         | 29.0 (36)               | 22.0 (26)                 | 29.6 (147)            | 27.9 (76)               |          |
| <i>&gt; 20/year</i>      | 47.6 (59)               | 62.7 (74)                 | 51.4 (255)            | 59.9 (163)              |          |
| <b>Tangerine</b>         |                         |                           |                       |                         | < 0.001  |
| <i>Never</i>             | 6.5 (8)                 | 1.7 (2)                   | 2.8 (14)              | 2.6 (7)                 |          |
| <i>1-2/year</i>          | 12.9 (16)               | 13.6 (16)                 | 4.2 (21)              | 1.8 (5)                 |          |
| <i>3-5/year</i>          | 25.8 (32)               | 19.5 (23)                 | 12.7 (63)             | 13.6 (37)               |          |
| <i>6-20/year</i>         | 33.9 (42)               | 30.5 (36)                 | 33.0 (164)            | 28.7 (78)               |          |
| <i>&gt; 20/year</i>      | 21.0 (26)               | 34.7 (41)                 | 47.3 (235)            | 53.3 (145)              |          |
| <b>Flax seeds</b>        |                         |                           |                       |                         | 0.002    |
| <i>Never</i>             | 81.9 (181)              | 70.1 (171)                | 76.6 (579)            | 71.8 (534)              |          |
| <i>≤ 1 per month</i>     | 11.3 (25)               | 15.2 (37)                 | 9.5 (72)              | 10.6 (79)               |          |
| <i>2-3 per month</i>     | 3.2 (7)                 | 6.6 (16)                  | 4.4 (33)              | 5.4 (40)                |          |
| <i>1-2 per week</i>      | 1.4 (3)                 | 4.5 (11)                  | 2.8 (21)              | 4.2 (31)                |          |
| <i>≥ 3 per week</i>      | 2.3 (5)                 | 3.7 (9)                   | 6.7 (51)              | 8.1 (60)                |          |
| <b>Spinach</b>           |                         |                           |                       |                         | 0.003    |
| <i>Never</i>             | 11.0 (24)               | 6.6 (16)                  | 14.2 (106)            | 8.1 (60)                |          |
| <i>≤ 1 per month</i>     | 56.2 (123)              | 60.9 (148)                | 56.9 (425)            | 57.4 (424)              |          |
| <i>2-3 per month</i>     | 29.7 (65)               | 26.7 (65)                 | 24.8 (185)            | 30.7 (227)              |          |
| <i>1-2 per week</i>      | 3.2 (7)                 | 5.8 (14)                  | 4.1 (31)              | 3.8 (28)                |          |
| <b>Vitamins/Minerals</b> |                         |                           |                       |                         | < 0.001  |
| <i>No (=0)</i>           | 70.8 (155)              | 55.8 (135)                | 68.9 (511)            | 49.9 (368)              |          |
| <i>Yes (=1)</i>          | 29.2 (64)               | 44.2 (107)                | 31.1 (31)             | 50.1 (369)              |          |

Given as % (n). Raw Tomato: N=1973 (young male: n=221; young female: n=244; old male: n=761; old female: n=747); Ketchup: N=1951 (n=220, n=243, n=748, n=740); Tomato sauce: N=1951 (n=220, n=243, n=747, n=741); Carrot juice: N=1953 (n=221, n=244, n=754, n=734); Multivitamin juice: N=1955 (n=221, n=244, n=755, n=735); Nuts: N=1966 (n=220, n=244, n=757, n=745); Orange juice: N=1946 (n=220, n=243, n=746, n=737); Carrots: N=1010 (n=124, n=118, n=496, n=272); Tangerine: N=1011 (n=124, n=118, n=497, n=272); Flax seeds: N=1965 (n=221, n=244, n=756, n=744), Spinach: N=1948 (n=219, n=243, n=747, n=739), Vitamins/Minerals: N=1940 (n=219, n=242, n=742, n=737).
